# Supplementary material
Source: PubMed Central journal article supplement (PMC6376903)
Supplement: djy084_supp.pdf [file djy084_supp.pdf]

## Supplementary Materials: Antibodies against *Chlamydia trachomatis* and ovarian cancer risk in two independent populations

### Supplementary Methods:

#### **C. trachomatis pGP3 assay validation**

*C. trachomatis* Multiplex Serology based on antigen pGP3 (aa 1-267, NCBI Reference Sequence YP\_328713.1) was validated against a combination of two enzyme-linked immunosorbent assays (ELISA) also based on pGP3, an indirect ELISA (1) and a double-antigen sandwich ELISA (2). Reference assay *C. trachomatis* serostatus of all specimens was determined by a combination of both pGP3 ELISAs (3).

In total, 192 reference sera were kindly provided by Dr. Sarah Woodhall (PHE) through UK Biobank, represented by Dr. Alexander Mentzer (University of Oxford) acting as a trusted third party.

For validation of pGP3 Multiplex Serology, reference samples were tested at serum dilutions 1:100 and 1:1000 at the German Cancer Research Center (DKFZ) as previously described (4). Testing took place while DKFZ was still blinded for reference assay serostatus. After independently transferring both gold-standard (PHE) and DKFZ results to Oxford, all parties were unblinded with regard to reference assay serostatus ( $n_{\text{pos}} = 99$ ,  $n_{\text{neg}} = 93$ ). Statistical analysis included graphical representation of results (Supplementary Figure 1), contingency tables and calculation of sensitivity, specificity, and agreement (Supplementary Table 2).

#### **Development and validation of *M. genitalium* multiplex serology**

*M. genitalium* multiplex serology was validated against an enzyme-linked immunosorbent assay (ELISA) based on lipid-associated membrane proteins (LAMP) extracted from *M. genitalium* (5). Antigens for *M. genitalium* multiplex serology were selected based on known immunogenicity of adhesion protein MgPa (NCBI reference sequence WP\_010869366) (6). Two unconserved regions of the protein were selected to avoid cross-reactive antibody responses originating from the homologous protein P1 of *M. pneumonia* (6): MgPaN (aa 31-370) and rMgPa (aa 1,075-1,352).

In total, 71 reference sera were kindly provided by Dr. Annika Idahl (Umeå University, Sweden).

For validation, reference samples were tested at serum dilution 1:100 as described elsewhere (4). Testing and first data evaluation took place blinded for reference assay serostatus. For further statistical analysis, reference assay serostatus ( $n_{\text{pos}} = 35$ ,  $n_{\text{neg}} = 36$ ) was unblinded.

Both, MgPaN and rMgPa discriminate well between LAMP-ELISA positive and negative reference samples (Supplementary Figure 2). Optimal cut-offs (500 MFI) were identified by ROC-curve analysis (Prism 6, GraphPad Software Inc., La Jolla, CA, USA). Applying these cut-offs, sensitivity of MgPaN and rMgPa was high in comparison to LAMP-ELISA with 97.1% and 100%, respectively (Supplementary Table 3). Specificity was lower with 88.9% and 77.8%. Positivity to both proteins increased specificity to 94.4%, while sensitivity remained high with 97.1% and a very good agreement with LAMP-ELISA (kappa: 0.92; 95% CI: 0.82-100).

## Assay quality control

For quality control, we used a bead set with the viral capsid (VP1) of the BK virus, a ubiquitous polyomavirus with almost universal positive antibody status and a bead set without antigens for background determination.

Cases and matched controls from each study were included on the same plate, which included 92 study samples. Sera were tested at 1:100 serum dilution and there were no issues with assay detection limits. To evaluate assay performance, we included blinded duplicate samples from three study participants within and across each plate. The average concordance in marker positivity within and across plates was high (mean 97.7%), ranging from 87.5% to 100%. The intraclass correlation coefficients (ICC) for the continuous MFI levels were also high (mean 92.2%), ranging from 86.3 to 100%.

## REFERENCES

1. Wills GS, Horner PJ, Reynolds R, *et al.* Pgp3 antibody enzyme-linked immunosorbent assay, a sensitive and specific assay for seroepidemiological analysis of Chlamydia trachomatis infection. *Clin Vaccine Immunol.* 2009;16(6):835-43.
2. Horner PJ, Wills GS, Righarts A, *et al.* Chlamydia trachomatis Pgp3 Antibody Persists and Correlates with Self-Reported Infection and Behavioural Risks in a Blinded Cohort Study. *PLoS One.* 2016;11(3):e0151497.
3. Woodhall SC, Wills GS, Horner PJ, *et al.* Chlamydia trachomatis Pgp3 Antibody Population Seroprevalence before and during an Era of Widespread Opportunistic Chlamydia Screening in England (1994-2012). *PLoS One.* 2017;12(1):e0152810.
4. Waterboer T, Sehr P, Michael KM, *et al.* Multiplex human papillomavirus serology based on in situ-purified glutathione s-transferase fusion proteins. *Clin Chem.* 2005;51(10):1845-53.
5. Idahl A, Jurstrand M, Olofsson JI, *et al.* Mycoplasma genitalium serum antibodies in infertile couples and fertile women. *Sex Transm Infect.* 2015;91(8):589-91.
6. Svenstrup HF, Jensen JS, Gevaert K, *et al.* Identification and characterization of immunogenic proteins of mycoplasma genitalium. *Clin Vaccine Immunol.* 2006;13(8):913-22.

**Supplementary Table 1.** Serologic marker cutpoints for sero-positivity; Pearson correlations between serologic markers and with Chlamydia marker Pgp3 by study population (Polish case-control study and a nested case-control study conducted within the PLCO Cancer Screening Trial).

| Infectious agent               | marker cutpoint | Poland                                          |                        | PLCO                                    |                        | Poland Correlation with Pgp3 | PLCO Correlation with Pgp3 |
|--------------------------------|-----------------|-------------------------------------------------|------------------------|-----------------------------------------|------------------------|------------------------------|----------------------------|
|                                |                 | Correlated markers                              | Correlations (min-max) | Correlated markers                      | Correlations (min-max) |                              |                            |
| <i>Chlamydia trachomatis</i>   |                 |                                                 |                        |                                         |                        |                              |                            |
| Pgp3                           | 300             | MOMP-A, MOMP-D, MOMP-L2, Tarp-F1, Tarp-F2       | 0.50-0.63              | MOMP-D, MOMP-L2, Tarp-F1, Tarp-F2       | 0.62-0.72              |                              |                            |
| MOMP-A                         | 165             | Pgp3, MOMP-D, MOMP-L2, HSP60-1                  | 0.55-0.74              | MOMP-D, MOMP-L2, HSP60-1                | 0.51-0.78              | 0.50                         | 0.48                       |
| MOMP-D                         | 165             | Pgp3, MOMP-A, MOMP-L2, HSP60-1                  | 0.51-0.96              | Pgp3, MOMP-A, MOMP-L2, Tarp-F1, HSP60-1 | 0.55-0.95              | 0.62                         | 0.62                       |
| MOMP-L2                        | 165             | Pgp3, MOMP-A, MOMP-D, Tarp-F1, Tarp-F2, HSP60-1 | 0.52-0.96              | Pgp3, MOMP-A, MOMP-D, Tarp-F1, HSP60-1  | 0.55-0.95              | 0.63                         | 0.62                       |
| Tarp-F1                        | 250             | Pgp3, MOMP-L2, Tarp-F2                          | 0.52-0.65              | Pgp3, MOMP-L2, Tarp-F2                  | 0.52-0.72              | 0.60                         | 0.72                       |
| Tarp-F2                        | 150             | Pgp3, MOMP-L2, Tarp-F1                          | 0.52-0.65              | Pgp3, Tarp-F1                           | 0.65, 0.65             | 0.55                         | 0.65                       |
| HSP60-1                        | 200             | MOMP-A, MOMP-D, MOMP-L2                         | 0.51-0.55              | MOMP-A, MOMP-D, MOMP-L2                 | 0.51-0.55              | 0.47                         | 0.43                       |
| <i>Mycoplasma genitalium</i>   |                 |                                                 |                        |                                         |                        |                              |                            |
| MgPaN                          | 400             | rMgPa                                           | 0.55                   |                                         |                        | 0.19                         | 0.25                       |
| rMgPa                          | 400             | MgPaN                                           | 0.55                   |                                         |                        | 0.24                         | 0.35                       |
| Herpes Simplex Virus-2 (HSV-2) |                 |                                                 |                        |                                         |                        |                              |                            |
| mgGunique                      | 200             |                                                 |                        |                                         |                        | 0.30                         | 0.21                       |
| Human Papillomavirus (HPV)     |                 |                                                 |                        |                                         |                        |                              |                            |
| 11 L1                          | 500             |                                                 |                        |                                         |                        | 0.19                         | 0.23                       |
| 16 L1                          | 422             |                                                 |                        |                                         |                        | 0.20                         | 0.11                       |
| 18 L1                          | 394             | 45 L1                                           | 0.58                   | 45 L1                                   | 0.58                   | 0.10                         | 0.06                       |
| 31 L1                          | 712             |                                                 |                        |                                         |                        | 0.06                         | 0.08                       |
| 33 L1                          | 515             | 45 L1                                           | 0.52                   | 45 L1                                   | 0.52                   | 0.10                         | 0.11                       |
| 45 L1                          | 368             | 18 L1, 33 L1                                    | 0.52-0.58              | 18 L1, 33 L1                            | 0.52-0.58              | 0.18                         | 0.05                       |
| Herpes Simplex Virus-1 (HSV-1) |                 |                                                 |                        |                                         |                        |                              |                            |
| gD                             | 250             |                                                 |                        |                                         |                        | 0.15                         | 0.09                       |
| Polyomavirus                   |                 |                                                 |                        |                                         |                        |                              |                            |
| BK VP1                         | 400             |                                                 |                        |                                         |                        | 0.00                         | 0.00                       |
| JC VP1                         | 400             |                                                 |                        |                                         |                        | 0.07                         | 0.09                       |
| HPyV9 VP1                      | 400             |                                                 |                        |                                         |                        | 0.06                         | -0.01                      |
| Hepatitis C Virus              |                 |                                                 |                        |                                         |                        |                              |                            |
| Core                           | 1000            | NS3                                             | 0.93                   |                                         |                        | 0.01                         | -0.06                      |
| NS3                            | 500             | Core                                            | 0.93                   |                                         |                        | 0.02                         | -0.02                      |
| Hepatitis B Virus              |                 |                                                 |                        |                                         |                        |                              |                            |
| HbC                            | 800             | HBVAe                                           | 0.97                   | HBVAe                                   | 0.88                   | 0.10                         | 0.04                       |
| HBe                            | 800             | HBVAc                                           | 0.97                   | HBVAc                                   | 0.88                   | 0.09                         | 0.01                       |
| Epstein Barr Virus (EBV)       |                 |                                                 |                        |                                         |                        |                              |                            |
| Zebra                          | 300             | EA-D                                            | 0.53                   | EA-D                                    | 0.58                   | 0.11                         | 0.10                       |
| EA-D                           | 700             | Zebra                                           | 0.53                   | Zebra                                   | 0.58                   | 0.08                         | 0.05                       |
| EBNA-1                         | 350             |                                                 |                        |                                         |                        | 0.05                         | 0.04                       |
| Cytomegalovirus (CMV)          |                 |                                                 |                        |                                         |                        |                              |                            |
| pp150N                         | 400             | pp52, pp28                                      | 0.60-0.61              | pp52, pp28                              | 0.76-0.78              | 0.09                         | 0.18                       |
| pp52                           | 400             | pp150N, pp28                                    | 0.60-0.63              | pp150N, pp28                            | 0.73-0.76              | 0.13                         | 0.16                       |
| pp28                           | 400             | pp150N, pp52                                    | 0.61-0.63              | pp150N, pp52                            | 0.73-0.78              | 0.07                         | 0.15                       |

**Supplementary Table 2.** Contingency tables and summary statistics showing concordantly and discordantly reacting sera in pGP3 Multiplex Serology in comparison to reference assay serostatus tested at serum dilution 1:100 (A) [MFI cut-off = 500] and 1:1000 (B) [MFI cut-off = 95].\*

| Multiplex serology | Reference assay |                 | Sensitivity (95% CI) | Specificity (95% CI) | Agreement <i>kappa</i> (95% CI) |
|--------------------|-----------------|-----------------|----------------------|----------------------|---------------------------------|
|                    | Positive (n=99) | Negative (n=93) |                      |                      |                                 |
| <b>A</b>           |                 |                 |                      |                      |                                 |
| pGP3+              | 97              | 3               |                      |                      |                                 |
| pGP3-              | 2               | 90              | 98.0 (92.9-99.8)     | 96.8 (90.9-99.3)     | 0.95 (0.90-0.99)                |
| <b>B</b>           |                 |                 |                      |                      |                                 |
| pGP3+              | 97              | 4               |                      |                      |                                 |
| pGP3-              | 2               | 89              | 98.0 (92.9-99.8)     | 95.7 (89.4-98.8)     | 0.94 (0.89-0.99)                |

\*Statistical analysis was conducted using SAS software, version 9.4 (SAS Institute Inc., Cary, NC, USA). For sensitivity and specificity, exact 95 % confidence intervals (CI) are reported.

**Supplementary Table 3.** Contingency tables and summary statistics showing concordantly and discordantly reacting sera in *M. genitalium* multiplex serology in comparison to reference assay serostatus (LAMP-ELISA) tested at serum dilution 1:100 and MFI cut-off of 500.\*

| Multiplex serology | LAMP-ELISA      |                 | Sensitivity (95% CI) | Specificity (95% CI) | Agreement <i>kappa</i> (95% CI) |
|--------------------|-----------------|-----------------|----------------------|----------------------|---------------------------------|
|                    | Positive (n=35) | Negative (n=36) |                      |                      |                                 |
| MgPaN +            | 34              | 4               |                      |                      |                                 |
| MgPaN -            | 1               | 32              | 97.1 (85.1-99.9)     | 88.9 (73.9-96.9)     | 0.86 (0.74-0.98)                |
| rMgPa +            | 35              | 8               |                      |                      |                                 |
| rMgPa -            | 0               | 28              | 100 (90.0-100)       | 77.8 (60.9-89.9)     | 0.77 (0.62-0.92)                |
| Both +             | 34              | 2               |                      |                      |                                 |
| ≤ 1 +              | 1               | 34              | 97.1 (85.1-99.9)     | 94.4 (81.3-99.3)     | 0.92 (0.82-1.00)                |

\*Statistical analysis was conducted using SAS software, version 9.4 (SAS Institute Inc., Cary, NC, USA). For sensitivity and specificity, exact 95 % confidence intervals (CI) are reported.

**Supplementary Table 4.** Serologic marker associations by serous/non-serous ovarian histotype in a Polish case-control study and a nested case-control study conducted within the PLCO Cancer Screening Trial. Chlamydia markers include evaluation at laboratory cutpoint for positivity and with increasing marker titer (established in Poland and tested in PLCO) to evaluate association with PID-like infection.

| Infectious agent                     | marker cutpoint | Poland      |      |                         |      |                  | PLCO             |      |                        |                  |              | P het† |                            |      |                   |                   |      |                   |                   |      |
|--------------------------------------|-----------------|-------------|------|-------------------------|------|------------------|------------------|------|------------------------|------------------|--------------|--------|----------------------------|------|-------------------|-------------------|------|-------------------|-------------------|------|
|                                      |                 | controls n+ | %+   | serous cases (n=112) n+ | %+   | OR* (95% CI)     | controls n+      | %+   | serous cases (n=84) n+ | %+               | OR* (95% CI) |        | non-serous cases (n=68) n+ | %+   | OR* (95% CI)      |                   |      |                   |                   |      |
| <i>Chlamydia trachomatis</i>         |                 |             |      |                         |      |                  |                  |      |                        |                  |              |        |                            |      |                   |                   |      |                   |                   |      |
| Pgp3                                 |                 |             |      |                         |      |                  |                  |      |                        |                  |              |        |                            |      |                   |                   |      |                   |                   |      |
| Lab outpoint (cutpoint 1)            | 300             | 192         | 34.5 | 47                      | 42.0 | 1.30 (0.84-2.01) | 64               | 48.5 | 1.79 (1.20-2.66)       | 0.25             | 34           | 21.4   | 19                         | 22.6 | 1.16 (0.58-2.34)  | 18                | 26.5 | 1.59 (0.78-3.25)  | 0.80              |      |
| Increase OR from Poland (cutpoint 2) | 3878            | 97          | 17.4 | 33                      | 29.5 | 1.85 (1.13-3.03) | 37               | 28.0 | 2.01 (1.26-3.19)       | 0.85             | 17           | 10.7   | 13                         | 15.5 | 1.98 (0.82-4.75)  | 14                | 20.6 | 2.99 (1.24-7.17)  | 0.70              |      |
| Max OR from Poland (cutpoint 3)      | 8839            | 36          | 6.5  | 14                      | 12.5 | 2.24 (1.12-4.46) | 14               | 10.6 | 2.06 (1.04-4.08)       | 0.88             | 3            | 1.9    | 4                          | 4.8  | 3.04 (0.61-15.27) | 3                 | 4.4  | 2.73 (0.51-14.71) | 0.63              |      |
| MOMP-A                               |                 |             |      |                         |      |                  |                  |      |                        |                  |              |        |                            |      |                   |                   |      |                   |                   |      |
| Lab outpoint                         | 165             | 146         | 26.3 | 36                      | 32.1 | 1.38 (0.87-2.17) | 44               | 33.3 | 1.39 (0.91-2.12)       | 0.96             | 41           | 25.8   | 19                         | 22.6 | 0.89 (0.46-1.74)  | 13                | 19.1 | 0.75 (0.36-1.58)  | 0.45              |      |
| Increase OR from Poland              | 386             | 78          | 14.0 | 24                      | 21.4 | 1.81 (1.07-3.08) | 28               | 21.2 | 1.73 (1.05-2.85)       | 0.88             | 25           | 15.7   | 13                         | 15.5 | 1.15 (0.53-2.54)  | 10                | 14.7 | 1.06 (0.46-2.47)  | 0.87              |      |
| Max OR from Poland                   | 1727            | 22          | 4.0  | 11                      | 9.8  | 2.95 (1.33-6.54) | 11               | 8.3  | 2.80 (1.27-6.18)       | 0.69             | 6            | 3.8    | 1                          | 1.2  | 0.43 (0.05-3.82)  | 5                 | 7.4  | 2.46 (0.67-8.97)  | 0.09              |      |
| MOMP-D                               |                 |             |      |                         |      |                  |                  |      |                        |                  |              |        |                            |      |                   |                   |      |                   |                   |      |
| Lab outpoint                         | 165             | 186         | 33.5 | 38                      | 33.9 | 1.01 (0.64-1.58) | 51               | 38.6 | 1.25 (0.83-1.88)       | 0.57             | 38           | 23.9   | 20                         | 23.8 | 1.19 (0.61-2.34)  | 18                | 26.5 | 1.37 (0.67-2.77)  | 0.92              |      |
| Increase OR from Poland              | 638             | 81          | 14.6 | 25                      | 22.3 | 1.71 (1.01-2.89) | 31               | 23.5 | 1.83 (1.12-2.99)       | 0.98             | 21           | 13.2   | 10                         | 11.9 | 1.12 (0.46-2.70)  | 11                | 16.2 | 1.52 (0.64-3.65)  | 0.83              |      |
| Max OR from Poland                   | 1042            | 59          | 10.6 | 23                      | 20.5 | 2.16 (1.23-3.78) | 24               | 18.2 | 1.93 (1.12-3.32)       | 0.60             | 13           | 8.2    | 7                          | 8.3  | 1.32 (0.47-3.72)  | 9                 | 13.2 | 2.31 (0.86-6.19)  | 0.63              |      |
| MOMP-L2                              |                 |             |      |                         |      |                  |                  |      |                        |                  |              |        |                            |      |                   |                   |      |                   |                   |      |
| Lab outpoint                         | 250             | 127         | 22.8 | 37                      | 33.0 | 1.55 (0.97-2.47) | 45               | 34.1 | 1.78 (1.16-2.73)       | 0.74             | 32           | 20.1   | 17                         | 20.2 | 1.30 (0.63-2.70)  | 13                | 19.1 | 1.10 (0.50-2.41)  | 0.52              |      |
| Increase OR from Poland              | 602             | 77          | 13.8 | 24                      | 21.4 | 1.70 (0.99-2.91) | 35               | 26.5 | 2.26 (1.40-3.66)       | 0.49             | 21           | 13.2   | 10                         | 11.9 | 1.20 (0.49-2.92)  | 10                | 14.7 | 1.36 (0.56-3.34)  | 0.93              |      |
| Max OR from Poland                   | 834             | 65          | 11.7 | 24                      | 21.4 | 2.05 (1.19-3.54) | 31               | 23.5 | 2.35 (1.41-3.90)       | 0.86             | 16           | 10.1   | 9                          | 10.7 | 1.66 (0.63-4.36)  | 9                 | 13.2 | 1.70 (0.65-4.46)  | 0.98              |      |
| Tarp-F1                              |                 |             |      |                         |      |                  |                  |      |                        |                  |              |        |                            |      |                   |                   |      |                   |                   |      |
| Lab outpoint                         | 265             | 185         | 33.3 | 47                      | 42.0 | 1.48 (0.96-2.29) | 47               | 35.6 | 1.05 (0.69-1.59)       | 0.18             | 41           | 25.8   | 26                         | 31.0 | 1.45 (0.78-2.72)  | 21                | 30.9 | 1.36 (0.71-2.61)  | 0.60              |      |
| Increase OR from Poland              | 1326            | 78          | 14.0 | 23                      | 20.5 | 1.42 (0.82-2.46) | 25               | 18.9 | 1.44 (0.86-2.41)       | 0.88             | 19           | 11.9   | 9                          | 10.7 | 1.03 (0.41-2.59)  | 12                | 17.6 | 1.91 (0.81-4.50)  | 0.58              |      |
| Max OR from Poland                   | 1689            | 62          | 11.2 | 19                      | 17.0 | 1.45 (0.80-2.64) | 22               | 16.7 | 1.57 (0.91-2.72)       | 0.74             | 17           | 10.7   | 7                          | 8.3  | 0.89 (0.32-2.47)  | 11                | 16.2 | 2.00 (0.81-4.96)  | 0.41              |      |
| Tarp-F2                              |                 |             |      |                         |      |                  |                  |      |                        |                  |              |        |                            |      |                   |                   |      |                   |                   |      |
| Lab outpoint                         | 165             | 261         | 46.9 | 54                      | 48.2 | 1.01 (0.66-1.54) | 72               | 54.5 | 1.37 (0.92-2.03)       | 0.26             | 61           | 38.4   | 33                         | 39.3 | 1.15 (0.64-2.06)  | 29                | 42.6 | 1.33 (0.71-2.47)  | 0.90              |      |
| Increase OR from Poland              | 1667            | 50          | 9.0  | 19                      | 17.0 | 2.03 (1.11-3.74) | 18               | 13.6 | 1.72 (0.94-3.12)       | 0.87             | 23           | 14.5   | 11                         | 13.1 | 0.92 (0.40-2.14)  | 10                | 14.7 | 1.21 (0.50-2.89)  | 0.71              |      |
| Max OR from Poland                   | 2106            | 38          | 6.8  | 17                      | 15.2 | 2.49 (1.30-4.80) | 15               | 11.4 | 1.97 (1.02-3.81)       | 0.77             | 21           | 13.2   | 9                          | 10.7 | 0.80 (0.32-1.98)  | 9                 | 13.2 | 1.20 (0.48-2.98)  | 0.61              |      |
| HSP60-1                              |                 |             |      |                         |      |                  |                  |      |                        |                  |              |        |                            |      |                   |                   |      |                   |                   |      |
| Lab outpoint                         | 200             | 192         | 34.5 | 47                      | 42.0 | 1.30 (0.84-2.01) | 64               | 48.5 | 1.79 (1.20-2.66)       | 0.25             | 57           | 35.8   | 32                         | 38.1 | 1.22 (0.68-2.19)  | 30                | 44.1 | 1.62 (0.88-2.99)  | 0.36              |      |
| Increase OR from Poland              | 1308            | 157         | 28.2 | 42                      | 37.5 | 1.46 (0.94-2.29) | 53               | 40.2 | 1.70 (1.13-2.57)       | 0.75             | 15           | 9.4    | 10                         | 11.9 | 1.23 (0.49-3.11)  | 8                 | 11.8 | 1.49 (0.56-3.95)  | 0.82              |      |
| Max OR from Poland                   | 3407            | 110         | 19.8 | 35                      | 31.3 | 1.70 (1.05-2.75) | 39               | 29.5 | 1.82 (1.16-2.86)       | 0.94             | 6            | 3.8    | 3                          | 3.6  | 0.81 (0.18-3.70)  | 2                 | 2.9  | 0.87 (0.16-4.66)  | 0.81              |      |
| Seropositive‡                        |                 | 158         | 28.4 | 38                      | 33.9 | 1.22 (0.77-1.92) | 51               | 38.6 | 2.42 (1.06-2.42)       | 0.35             | 34           | 21.4   | 21                         | 25.0 | 1.40 (0.71-2.78)  | 15                | 22.1 | 1.24 (0.59-2.61)  | 0.50              |      |
| <i>Mycoplasma genitalium</i>         |                 |             |      |                         |      |                  |                  |      |                        |                  |              |        |                            |      |                   |                   |      |                   |                   |      |
| MgPaN                                |                 |             |      |                         |      |                  |                  |      |                        |                  |              |        |                            |      |                   |                   |      |                   |                   |      |
| Lab outpoint                         | 400             | 166         | 29.9 | 36                      | 32.1 | 1.08 (0.69-1.71) | 48               | 36.4 | 1.38 (0.91-2.08)       | 0.31             | 36           | 22.6   | 12                         | 14.3 | 0.60 (0.28-1.30)  | 12                | 17.6 | 0.87 (0.40-1.90)  | 0.49              |      |
| Increase OR from Poland              | 400             | 183         | 32.9 | 41                      | 36.6 | 1.12 (0.72-1.74) | 53               | 40.2 | 1.48 (0.99-2.22)       | 0.22             | 50           | 31.4   | 22                         | 26.2 | 0.83 (0.44-1.57)  | 17                | 25.0 | 0.81 (0.41-1.59)  | 0.92              |      |
| Max OR from Poland                   | 400             | 103         | 18.5 | 23                      | 20.5 | 1.06 (0.62-1.81) | 35               | 26.5 | 2.68 (1.07-2.68)       | 0.09             | 19           | 11.9   | 8                          | 9.5  | 0.83 (0.32-2.16)  | 4                 | 5.9  | 0.52 (0.16-1.71)  | 0.53              |      |
| Seropositive‡                        |                 |             |      |                         |      |                  |                  |      |                        |                  |              |        |                            |      |                   |                   |      |                   |                   |      |
| Herpes Simplex Virus-2 (HSV-2)       |                 |             |      |                         |      |                  |                  |      |                        |                  |              |        |                            |      |                   |                   |      |                   |                   |      |
| mgGunique                            |                 |             |      |                         |      |                  |                  |      |                        |                  |              |        |                            |      |                   |                   |      |                   |                   |      |
| Lab outpoint                         | 200             | 115         | 20.7 | 23                      | 20.5 | 0.96 (0.56-1.64) | 32               | 24.2 | 1.20 (0.75-1.93)       | 0.48             | 28           | 17.6   | 22                         | 26.2 | 1.98 (0.98-3.99)  | 12                | 17.6 | 1.16 (0.52-2.60)  | 0.23              |      |
| Human Papillomavirus (HPV)           |                 |             |      |                         |      |                  |                  |      |                        |                  |              |        |                            |      |                   |                   |      |                   |                   |      |
| 11 L1                                |                 |             |      |                         |      |                  |                  |      |                        |                  |              |        |                            |      |                   |                   |      |                   |                   |      |
| Lab outpoint                         | 500             | 25          | 4.5  | 5                       | 4.5  | 1.09 (0.40-2.99) | 6                | 4.5  | 1.02 (0.40-2.60)       | 0.81             | 3            | 1.9    | 3                          | 3.6  | 1.82 (0.34-9.71)  | 7                 | 10.3 | 7.71 (1.81-32.87) | 0.02              |      |
| Increase OR from Poland              | 422             | 23          | 4.1  | 10                      | 8.9  | 2.48 (1.11-5.54) | 7                | 5.3  | 1.23 (0.51-3.00)       | 0.29             | 3            | 1.9    | 0                          | 0.0  | --                | 2                 | 2.9  | 1.31 (0.17-10.12) | 0.99              |      |
| Max OR from Poland                   | 18 L1           | 394         | 34   | 6.1                     | 6    | 5.4              | 0.94 (0.38-2.35) | 11   | 8.3                    | 1.48 (0.71-3.08) | 0.58         | 6      | 3.8                        | 3    | 3.6               | 1.33 (0.30-6.00)  | 2    | 2.9               | 0.83 (0.15-4.48)  | 0.80 |
| Seropositive‡                        | 31 L1           | 712         | 23   | 4.1                     | 6    | 5.4              | 1.27 (0.49-3.27) | 4    | 3.0                    | 0.62 (0.20-1.87) | 0.21         | 6      | 3.8                        | 3    | 3.6               | 1.35 (0.29-6.25)  | 1    | 1.5               | 0.31 (0.03-2.72)  | 0.15 |
|                                      | 33 L1           | 515         | 13   | 2.3                     | 6    | 5.4              | 2.23 (0.80-6.19) | 4    | 3.0                    | 1.17 (0.36-3.76) | 0.34         | 1      | 0.6                        | 0    | 0.0               | --                | 0    | 0.0               | --                |      |
|                                      | 45 L1           | 368         | 32   | 5.8                     | 7    | 6.3              | 1.27 (0.53-3.02) | 10   | 7.6                    | 1.40 (0.65-3.03) | 0.91         | 2      | 1.3                        | 2    | 2.4               | 1.92 (0.25-14.93) | 3    | 4.4               | 4.20 (0.62-28.59) | 0.30 |
| Seropositive‡                        |                 | 69          | 12.4 | 20                      | 17.9 | 1.20 (0.96-2.99) | 20               | 15.2 | 1.25 (0.72-2.19)       | 0.36             | 14           | 8.8    | 7                          | 8.3  | 1.22 (0.43-3.46)  | 6                 | 8.8  | 0.90 (0.30-2.68)  | 0.88              |      |
| Herpes Simplex Virus-1 (HSV-1)       |                 |             |      |                         |      |                  |                  |      |                        |                  |              |        |                            |      |                   |                   |      |                   |                   |      |
| gD                                   |                 |             |      |                         |      |                  |                  |      |                        |                  |              |        |                            |      |                   |                   |      |                   |                   |      |
| Lab outpoint                         | 250             | 540         | 97.1 | 106                     | 94.6 | 0.43 (0.15-1.21) | 129              | 97.7 | 0.87 (0.24-3.21)       | 0.38             | 131          | 82.4   | 62                         | 73.8 | 0.68 (0.34-1.35)  | 48                | 70.6 | 0.53 (0.26-1.09)  | 0.64              |      |
| Polyomavirus                         |                 |             |      |                         |      |                  |                  |      |                        |                  |              |        |                            |      |                   |                   |      |                   |                   |      |
| BK VP1                               |                 |             |      |                         |      |                  |                  |      |                        |                  |              |        |                            |      |                   |                   |      |                   |                   |      |
| Lab outpoint                         | 400             | 520         | 93.5 | 95                      | 84.8 | 0.39 (0.21-0.74) | 122              | 92.4 | 0.90 (0.43-1.89)       | 0.04             | 145          | 91.2   | 78                         | 92.9 | 1.42 (0.42-4.81)  | 62                | 91.2 | 1.60 (0.42-6.10)  | 0.76              |      |
| Increase OR from Poland              | 400             | 377         | 67.8 | 70                      | 62.5 | 0.81 (0.52-1.26) | 79               | 59.8 | 0.71 (0.48-1.07)       | 0.70             | 94           | 59.1   | 51                         | 60.7 | 1.21 (0.68-2.14)  | 38                | 55.9 | 0.89 (0.49-1.63)  | 0.42              |      |
| Max OR from Poland                   | 400             | 314         | 56.5 | 55                      | 49.1 | 0.77 (0.51-1.19) | 59               | 44.7 | 0.65 (0.44-0.96)       | 0.50             | 53           | 33.3   | 31                         | 36.9 | 1.33 (0.74-2.39)  | 21                | 30.9 | 0.91 (0.48-1.73)  | 0.32              |      |
| Hepatitis C Virus                    |                 |             |      |                         |      |                  |                  |      |                        |                  |              |        |                            |      |                   |                   |      |                   |                   |      |
| Core                                 |                 |             |      |                         |      |                  |                  |      |                        |                  |              |        |                            |      |                   |                   |      |                   |                   |      |
| Lab outpoint                         | 1000            | 22          | 4.0  | 4                       | 3.6  | 1.02 (0.33-3.14) | 10               | 7.6  | 2.22 (0.98-5.03)       | 0.19             | 3            | 1.9    | 4                          | 4.8  | 3.78 (0.70-20.49) | 0                 | 0.0  | --                | 0.98              |      |
| Increase OR from Poland              | 500             | 49          | 8.8  | 5                       | 4.5  | 0.49 (0.19-1.29) | 10               | 7.6  | 0.87 (0.42-1.80)       | 0.24             | 1            | 0.6    | 1                          | 1.2  | 2.28 (0.12-41.76) | 0                 | 0.0  | --                | 0.99              |      |
| Max OR from Poland                   | 500             | 18          | 3.2  | 3                       | 2.7  | 0.97 (0.27-3.46) | 7                | 5.3  | 5.22 (0.79-5.22)       | 0.27             | 0            | 0.0    | 1                          | 1.2  | --                | 0                 | 0.0  | --                | 0.99              |      |
| Seropositive‡                        |                 |             |      |                         |      |                  |                  |      |                        |                  |              |        |                            |      |                   |                   |      |                   |                   |      |
| Hepatitis B Virus                    |                 |             |      |                         |      |                  |                  |      |                        |                  |              |        |                            |      |                   |                   |      |                   |                   |      |
| HBc                                  |                 |             |      |                         |      |                  |                  |      |                        |                  |              |        |                            |      |                   |                   |      |                   |                   |      |
| Lab outpoint                         | 800             | 100         | 18.0 | 21                      | 18.8 | 1.10 (0.64-1.90) | 15               | 11.4 | 0.57 (0.31-1.02)       | 0.11             | 3            | 1.9    | 0                          | 0.0  | --                | 1                 | 1.5  | 0.79 (0.06-10.79) | 0.99              |      |
| Increase OR from Poland              | 800             | 113         | 20.3 | 22                      | 19.6 | 1.00 (0.59-1.71) | 16               | 12.1 | 0.54 (0.30-0.95)       | 0.12             | 5            | 3.1    | 3                          | 3.6  | 1.04 (0.23-4.81)  | 2                 | 2.9  | 0.86 (0.15-4.91)  | 0.70              |      |
| Max OR from Poland                   | 800             | 99          | 17.8 | 21                      | 18.8 | 1.13 (0.65-1.94) | 15               | 11.4 | 1.04 (0.32-1.04)       | 0.11             | 3            | 1.9    | 0                          | 0.0  | --                | 1                 | 1.5  | 0.79 (0.06-10.79) | 0.99              |      |
| Seropositive‡                        |                 |             |      |                         |      |                  |                  |      |                        |                  |              |        |                            |      |                   |                   |      |                   |                   |      |
| Epstein Barr Virus (EBV)             |                 |             |      |                         |      |                  |                  |      |                        |                  |              |        |                            |      |                   |                   |      |                   |                   |      |
| Zebra                                |                 |             |      |                         |      |                  |                  |      |                        |                  |              |        |                            |      |                   |                   |      |                   |                   |      |
| Lab outpoint                         | 300             | 531         | 95.5 | 107                     | 95.5 | 0.98 (0.36-2.69) | 124              | 93.9 | 0.80 (0.33-1.94)       | 0.38             | 149          | 93.7   | 77                         | 91.7 | 0.82 (0.25-2.71)  | 61                | 89.7 | 0.85 (0.24-3.04)  | 0.49              |      |
| Increase OR from Poland              | 700             | 403         | 72.5 | 85                      | 75.9 | 1.18 (0.72-1.92) | 102              | 77.3 | 1.27 (0.80-2.01)       | 0.98             | 130          | 81.8   | 70                         | 83.3 | 1.25 (0.58-2.70)  | 51                | 75.0 | 0.78 (0.37-1.63)  | 0.42              |      |
| Max OR from Poland                   | 350             | 534         | 96.0 | 106                     | 94.6 | 0.80 (0.29-2.18) | 122              | 92.4 | 0.48 (0.22-1.05)       | 0.51             | 141          | 88.7   | 78                         | 92.9 | 2.17 (0.68-6.92)  | 56                | 82.4 | 0.74 (0.30-1.83)  | 0.11              |      |
| Seropositive‡                        |                 | 531         | 95.5 | 108                     | 96.4 | 1.22 (0.41-3.64) | 124              | 93.9 | 1.63 (0.30-1.63)       | 0.36             | 148          | 93.1   | 77                         | 91.7 | 0.94 (0.29-3.05)  | 60                | 88.2 | 0.72 (0.22-2.33)  | 0.92              |      |
| Cytomegalovirus (CMV)                |                 |             |      |                         |      |                  |                  |      |                        |                  |              |        |                            |      |                   |                   |      |                   |                   |      |
| pp150N                               |                 |             |      |                         |      |                  |                  |      |                        |                  |              |        |                            |      |                   |                   |      |                   |                   |      |
| Lab outpoint                         | 400             | 526         | 94.6 | 106                     | 94.6 | 1.07 (0.42-2.74) | 120              | 90.9 | 0.55 (0.27-1.15)       | 0.17             | 116          | 73.0   | 57                         | 67.9 | 0.88 (0.47-1.66)  | 54                | 79.4 | 1.82 (0.85-3.91)  | 0.08              |      |
| Increase OR from Poland              | 400             | 537         | 96.6 | 106                     | 94.6 | 0.84 (0.29       |                  |      |                        |                  |              |        |                            |      |                   |                   |      |                   |                   |      |

**Supplementary Table 5.** Serologic marker associations by time between blood draw and diagnosis in a nested case-control study conducted within the PLCO Cancer Screening Trial. Adjusted arithmetic mean serologic marker levels by time between blood draw and diagnosis among ovarian cancer cases in PLCO.

| Infectious agent                     | Time between blood draw and diagnosis |      |      |                 |    | P het† | Time between blood draw and diagnosis |              |          |          |              |       |              |       |
|--------------------------------------|---------------------------------------|------|------|-----------------|----|--------|---------------------------------------|--------------|----------|----------|--------------|-------|--------------|-------|
|                                      | 2-<5 years (n=94)                     |      |      | 5+ years (n=66) |    |        | 2-<5 years                            |              | 5+ years |          | P§           |       |              |       |
|                                      | n                                     | %    | OR*  | (95% CI)        | n  | %      | OR*                                   | (95% CI)     | Mean‡    | (95% CI) |              | Mean‡ | (95% CI)     |       |
| <i>Chlamydia trachomatis</i>         |                                       |      |      |                 |    |        |                                       |              |          |          |              |       |              |       |
| Pgp3 - lab cutpoint (1)              | 24                                    | 25.5 | 1.50 | (0.78-2.88)     | 16 | 24.2   | 1.27                                  | (0.61-2.66)  | 0.72     | 1434     | (860, 2008)  | 1627  | (931, 2323)  | 0.25  |
| Increase OR from Poland (cutpoint 2) | 17                                    | 18.1 | 2.48 | (1.11-5.56)     | 11 | 16.7   | 1.99                                  | (0.81-4.91)  | 0.71     |          |              |       |              |       |
| Max OR from Poland (cutpoint 3)      | 4                                     | 4.3  | 2.71 | (0.56-13.1)     | 3  | 4.5    | 2.74                                  | (0.50-15.0)  | 0.89     |          |              |       |              |       |
| MOMP-A - lab cutpoint                | 17                                    | 18.1 | 0.67 | (0.34-1.30)     | 16 | 24.2   | 0.99                                  | (0.49-2.01)  | 0.31     | 231      | (110, 351)   | 345   | (199, 491)   | 0.40  |
| Increase OR from Poland              | 13                                    | 13.8 | 1.01 | (0.47-2.17)     | 11 | 16.7   | 1.15                                  | (0.50-2.62)  | 0.74     |          |              |       |              |       |
| Max OR from Poland                   | 3                                     | 3.2  | 0.98 | (0.23-4.24)     | 3  | 4.5    | 1.86                                  | (0.41-8.40)  | 0.41     |          |              |       |              |       |
| MOMP-D - lab cutpoint                | 24                                    | 25.5 | 1.36 | (0.72-2.59)     | 16 | 24.2   | 1.14                                  | (0.55-2.36)  | 0.70     | 337      | (184, 490)   | 506   | (320, 691)   | 0.11  |
| Increase OR from Poland              | 11                                    | 11.7 | 1.07 | (0.46-2.51)     | 11 | 16.7   | 1.54                                  | (0.63-3.73)  | 0.41     |          |              |       |              |       |
| Max OR from Poland                   | 7                                     | 7.4  | 1.16 | (0.42-3.19)     | 9  | 13.6   | 2.33                                  | (0.87-6.24)  | 0.19     |          |              |       |              |       |
| MOMP-L2 - lab cutpoint               | 24                                    | 25.5 | 1.27 | (0.67-2.40)     | 17 | 25.8   | 1.19                                  | (0.58-2.43)  | 0.87     | 339      | (195, 483)   | 448   | (273, 623)   | 0.19  |
| Increase OR from Poland              | 11                                    | 11.7 | 1.17 | (0.50-2.75)     | 11 | 16.7   | 1.58                                  | (0.65-3.82)  | 0.52     |          |              |       |              |       |
| Max OR from Poland                   | 10                                    | 10.6 | 1.56 | (0.62-3.93)     | 10 | 15.2   | 2.07                                  | (0.80-5.36)  | 0.53     |          |              |       |              |       |
| Tarp-F1 - lab cutpoint               | 34                                    | 36.2 | 2.01 | (1.11-3.62)     | 16 | 24.2   | 0.89                                  | (0.45-1.78)  | 0.03     | 757      | (497, 1016)  | 576   | (261, 891)   | 0.17  |
| Increase OR from Poland              | 13                                    | 13.8 | 1.41 | (0.62-3.19)     | 8  | 12.1   | 1.08                                  | (0.42-2.80)  | 0.87     |          |              |       |              |       |
| Max OR from Poland                   | 10                                    | 10.6 | 1.25 | (0.51-3.05)     | 8  | 12.1   | 1.21                                  | (0.46-3.22)  | 0.73     |          |              |       |              |       |
| Tarp-F2 - lab cutpoint               | 37                                    | 39.4 | 1.04 | (0.59-1.82)     | 30 | 45.5   | 1.34                                  | (0.72-2.49)  | 0.55     | 960      | (596, 1324)  | 639   | (198, 1081)  | 0.54  |
| Increase OR from Poland              | 16                                    | 17.0 | 1.35 | (0.63-2.89)     | 6  | 9.1    | 0.58                                  | (0.21-1.60)  | 0.13     |          |              |       |              |       |
| Max OR from Poland                   | 13                                    | 13.8 | 1.14 | (0.51-2.56)     | 5  | 7.6    | 0.53                                  | (0.18-1.57)  | 0.34     |          |              |       |              |       |
| HSP60-1 - lab cutpoint               | 42                                    | 44.7 | 1.61 | (0.92-2.79)     | 22 | 33.3   | 0.96                                  | (0.51-1.82)  | 0.08     | 644      | (407, 881)   | 540   | (253, 827)   | 0.61  |
| Increase OR from Poland              | 10                                    | 10.6 | 1.10 | (0.44-2.73)     | 8  | 12.1   | 1.41                                  | (0.53-3.74)  | 0.70     |          |              |       |              |       |
| Max OR from Poland                   | 3                                     | 3.2  | 0.75 | (0.17-3.33)     | 2  | 3.0    | 0.75                                  | (0.14-4.15)  | 0.84     |          |              |       |              |       |
| Seropositive                         | 23                                    | 24.5 | 1.45 | (0.75-2.80)     | 14 | 21.2   | 1.03                                  | (0.49-2.18)  | 0.49     |          |              |       |              |       |
| <i>Mycoplasma genitalium</i>         |                                       |      |      |                 |    |        |                                       |              |          |          |              |       |              |       |
| MgPaN                                | 16                                    | 17.0 | 0.83 | (0.41-1.65)     | 10 | 15.2   | 0.61                                  | (0.27-1.37)  | 0.44     | 319      | (168, 470)   | 305   | (122, 488)   | 0.82  |
| rMgPa                                | 31                                    | 33.0 | 1.26 | (0.71-2.27)     | 10 | 15.2   | 0.39                                  | (0.18-0.85)  | 0.004    | 553      | (376, 730)   | 258   | (43.8, 473)  | 0.06  |
| Seropositive                         | 10                                    | 10.6 | 0.99 | (0.41-2.40)     | 3  | 4.5    | 0.34                                  | (0.09-1.26)  | 0.13     |          |              |       |              |       |
| Herpes Simplex Virus-2 (HSV-2)       |                                       |      |      |                 |    |        |                                       |              |          |          |              |       |              |       |
| mgGunique                            | 24                                    | 25.5 | 1.96 | (1.00-3.86)     | 13 | 19.7   | 1.29                                  | (0.59-2.86)  | 0.41     | 600      | (304, 896)   | 726   | (367, 1085)  | 0.50  |
| Human Papillomavirus (HPV)           |                                       |      |      |                 |    |        |                                       |              |          |          |              |       |              |       |
| 11 L1                                | 10                                    | 10.6 | 6.15 | (1.56-24.24)    | 1  | 1.5    | 0.93                                  | (0.09-9.46)  | 0.11     | 145      | (113, 177)   | 85.4  | (46.6, 124)  | <0.01 |
| 16 L1                                | 0                                     | 0.0  | --   | --              | 2  | 3.0    | 1.38                                  | (0.18-10.74) | 0.99     | 63.0     | (25.2, 101)  | 82.2  | (36.5, 128)  | 0.64  |
| 18 L1                                | 3                                     | 3.2  | 1.02 | (0.23-4.47)     | 2  | 3.0    | 0.92                                  | (0.17-4.98)  | 0.95     | 114      | (80.0, 148)  | 91.5  | (50.2, 133)  | 0.70  |
| 31 L1                                | 4                                     | 4.3  | 1.09 | (0.27-4.31)     | 0  | 0.0    | --                                    | --           | 0.98     | 156      | (104, 208)   | 129   | (66.0, 193)  | 0.79  |
| 33 L1                                | 0                                     | 0.0  | --   | --              | 0  | 0.0    | --                                    | --           | 0.98     | 55.2     | (43.3, 67.1) | 56.8  | (42.4, 71.2) | 0.72  |
| 45 L1                                | 2                                     | 2.1  | 1.58 | (0.20-12.44)    | 3  | 4.5    | 4.27                                  | (0.63-28.99) | 0.39     | 92.1     | (59.4, 125)  | 87.1  | (47.5, 127)  | 0.80  |
| Seropositive                         | 8                                     | 8.5  | 1.00 | (0.37-2.69)     | 5  | 7.6    | 0.98                                  | (0.31-3.14)  | 0.96     |          |              |       |              |       |
| Herpes Simplex Virus-1 (HSV-1)       |                                       |      |      |                 |    |        |                                       |              |          |          |              |       |              |       |
| gD                                   | 70                                    | 74.5 | 0.63 | (0.33-1.22)     | 44 | 66.7   | 0.46                                  | (0.23-0.94)  | 0.64     | 3355     | (2668, 4042) | 2934  | (2102, 3767) | 0.06  |
| Polyomavirus                         |                                       |      |      |                 |    |        |                                       |              |          |          |              |       |              |       |
| BK VP1                               | 89                                    | 94.7 | 2.05 | (0.54-7.71)     | 58 | 87.9   | 0.89                                  | (0.29-2.77)  | 0.30     | 4550     | (3909, 5191) | 4101  | (3324, 4878) | 0.34  |
| JC VP1                               | 54                                    | 57.4 | 0.93 | (0.54-1.59)     | 41 | 62.1   | 1.31                                  | (0.70-2.47)  | 0.32     | 1105     | (853, 1357)  | 1167  | (861, 1472)  | 0.89  |
| HPyV9 VP1                            | 37                                    | 39.4 | 1.36 | (0.78-2.37)     | 18 | 27.3   | 0.87                                  | (0.45-1.68)  | 0.19     | 626      | (231, 1022)  | 507   | (27.8, 985)  | 0.09  |
| Hepatitis C Virus                    |                                       |      |      |                 |    |        |                                       |              |          |          |              |       |              |       |
| Core                                 | 4                                     | 4.3  | 2.16 | (0.43-10.93)    | 0  | 0.0    | --                                    | --           | 0.98     | 166      | (68.8, 264)  | 68.0  | (-50.0, 186) | 0.39  |
| NS3                                  | 1                                     | 1.1  | 1.13 | (0.06-20.63)    | 0  | 0.0    | --                                    | --           | 0.99     | 154      | (46.2, 263)  | 71.6  | (-59.7, 203) | 0.45  |
| Seropositive                         | 1                                     | 1.1  | --   | --              | 0  | 0.0    | --                                    | --           |          |          |              |       |              |       |
| Hepatitis B Virus                    |                                       |      |      |                 |    |        |                                       |              |          |          |              |       |              |       |
| HBC                                  | 1                                     | 1.1  | 0.37 | (0.03-4.14)     | 0  | 0.0    | --                                    | --           | 0.99     | 82.6     | (-87.0, 252) | 15.3  | (-190, 221)  | 0.42  |
| HBe                                  | 5                                     | 5.3  | 1.64 | (0.43-6.21)     | 0  | 0.0    | --                                    | --           | 0.98     | 207      | (-24.4, 438) | 75.5  | (-204, 355)  | 0.55  |
| Seropositive                         | 1                                     | 1.1  | --   | --              | 0  | 0.0    | --                                    | --           |          |          |              |       |              |       |
| Epstein Barr Virus (EBV)             |                                       |      |      |                 |    |        |                                       |              |          |          |              |       |              |       |
| Zebra                                | 86                                    | 91.5 | 0.75 | (0.24-2.34)     | 60 | 90.9   | 1.13                                  | (0.28-4.57)  | 0.30     | 5158     | (4477, 5839) | 4653  | (3828, 5479) | 0.65  |
| EAD                                  | 75                                    | 79.8 | 0.91 | (0.46-1.83)     | 53 | 80.3   | 1.16                                  | (0.51-2.64)  | 0.32     | 5082     | (4286, 5877) | 5427  | (4464, 6391) | 0.43  |
| EBNA1                                | 79                                    | 84.0 | 0.61 | (0.27-1.37)     | 62 | 93.9   | 8.40                                  | (1.07-65.95) | 0.01     | 5633     | (4847, 6418) | 6477  | (5526, 7429) | 0.41  |
| Seropositive                         | 86                                    | 91.5 | 0.77 | (0.25-2.32)     | 59 | 89.4   | 1.10                                  | (0.32-3.87)  | 0.40     |          |              |       |              |       |
| Cytomegalovirus (CMV)                |                                       |      |      |                 |    |        |                                       |              |          |          |              |       |              |       |
| pp150N                               | 68                                    | 72.3 | 1.04 | (0.56-1.93)     | 51 | 77.3   | 1.60                                  | (0.75-3.42)  | 0.45     | 3741     | (3101, 4381) | 3595  | (2820, 4370) | 0.82  |
| pp52                                 | 77                                    | 81.9 | 1.15 | (0.55-2.37)     | 53 | 80.3   | 1.23                                  | (0.54-2.83)  | 0.92     | 7313     | (6309, 8317) | 7349  | (6132, 8566) | 0.81  |
| pp28                                 | 74                                    | 78.7 | 0.96 | (0.48-1.90)     | 53 | 80.3   | 1.32                                  | (0.58-2.98)  | 0.59     | 4844     | (3945, 5743) | 5185  | (4096, 6274) | 0.80  |
| Seropositive                         | 72                                    | 76.6 | 1.06 | (0.55-2.03)     | 51 | 77.3   | 1.31                                  | (0.61-2.82)  | 0.80     |          |              |       |              |       |

\*Baseline category logistic regression models adjusting for matching factors (age, race, time of blood draw, month of blood draw) and adjusted for nulliparity, duration of oral contraceptive use, and duration of menopausal hormone therapy use.

†P values for heterogeneity are based on the likelihood ratio test from a model limited to cases with 2-<5 years between blood draw and diagnosis as the reference category, P values are two-sided.

‡Adjusted for age, race (white vs. non-white), time of blood draw (AM vs. PM), and month of blood draw.

§P values calculated using a two-tailed Wald test with an F-distribution as the reference distribution at alpha=0.05.

||The definition for seropositive for a specific antigen was based on the following: C. trachomatis≥3 markers positive (MOMP-A, MOMP-D, MOMP-L2, Tarp-F1, Tarp-F2, HSP60-1); M. genitalium, Hepatitis B, Hepatitis C, both markers positive; HPV if any of high risk types are positive (16, 18, 31, 33, 45); EBV and CMV at least 2 of 3 markers positive.

Frequency (n) and percent (%) reported based on seropositive (+) for individual markers or the combined marker ("Seropositive"). The reference category is seronegative for an individual marker or negative for the combined marker.

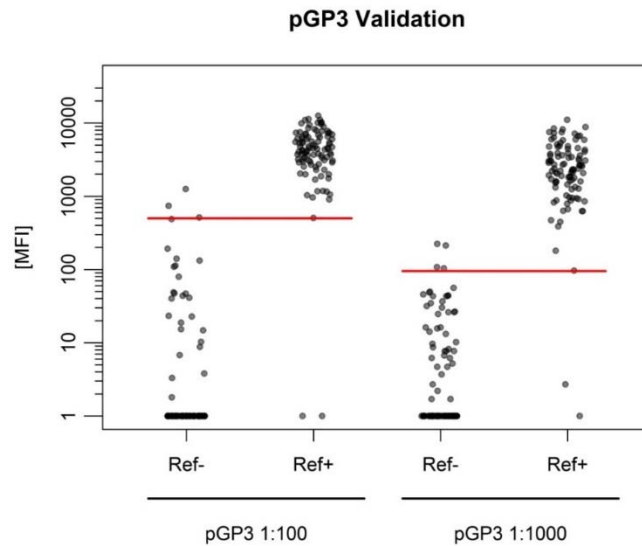

**Supplementary Figure 1.** pGP3 seroreactivity [median fluorescence intensity (MFI)] by reference assay serostatus. Sera were tested at two dilutions (1:100, 1:1000) for antibody reactivity against pGP3. The solid red lines indicate the cut-offs maximizing sensitivity and specificity (1:100, 500 MFI; 1:1000, 95 MFI). Ref+: reference assay seropositive, Ref-: reference assay seronegative. In total, 99 reference assay seropositive and 93 reference assay seronegative sera were analyzed.

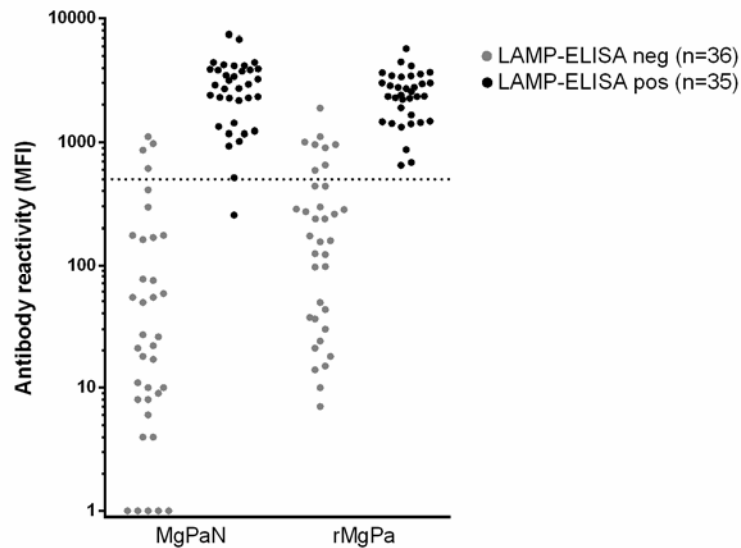

**Supplementary Figure 2.** Antibody reactivity [MFI] to *M. genitalium* proteins MgPaN and rMgPa stratified by reference assay serostatus. Sera were tested at dilution 1:100. The dashed line indicates the optimum cut-off (500 MFI).
